# Supplementary material for: Climate Impacts on Extreme Energy Consumption of Different Types of Buildings
Source: PLoS One. 2015 Apr 29;10(4):e0124413. doi: 10.1371/journal.pone.0124413 (PMC4414602; doi:10.1371/journal.pone.0124413)
Supplement: S2 File — Days for extreme energy consumption of three types of buildings. (XLS) [file pone.0124413.s002.xls]

## Sheet: Sheet1
			large venue building				commercial building				residential building
			days for extreme heating energy consumption	days for extreme cooling energy consumption			days for extreme heating energy consumption	days for extreme cooling energy consumption			days for extreme heating energy consumption
		1981	11	3		1981	7	11		1981	10
		1982	8	1		1982	6	1		1982	11
		1983	3	3		1983	7	5		1983	7
		1984	19	1		1984	19	3		1984	20
		1985	15	2		1985	19	3		1985	21
		1986	5	0		1986	8	0		1986	10
		1987	2	1		1987	8	1		1987	6
		1988	3	1		1988	4	5		1988	4
		1989	9	2		1989	0	2		1989	0
		1990	11	1		1990	10	2		1990	13
		1991	3	4		1991	3	3		1991	2
		1992	1	2		1992	0	2		1992	0
		1993	1	1		1993	3	0		1993	4
		1994	0	7		1994	3	16		1994	2
		1995	2	3		1995	0	4		1995	0
		1996	0	2		1996	0	5		1996	0
		1997	3	8		1997	5	10		1997	5
		1998	0	3		1998	7	9		1998	5
		1999	3	5		1999	1	8		1999	3
		2000	6	6		2000	10	11		2000	9
		2001	4	4		2001	14	6		2001	14
		2002	1	10		2002	4	10		2002	1
		2003	0	2		2003	0	3		2003	5
		2004	7	3		2004	7	3		2004	5
		2005	4	3		2005	2	5		2005	1
		2006	2	5		2006	3	5		2006	2
		2007	0	4		2007	0	0		2007	0
		2008	0	2		2008	5	0		2008	2
		2009	3	6		2009	2	0		2009	3
		2010	3	2		2010	14	5		2010	13
